# Supplementary material
Source: Research Square preprint supplement (doi:10.21203/rs.3.rs-9392522/v1)
Supplement: Supplementary file 1 [file 5b809155e0a6e8a5d9d67918.docx]

**Development, Hirshfeld surface analysis, DFT calculations and biological evaluation of neratinib loaded Co-crystals for solubility enhancement.**

**Scanning Absorbance Maxima**


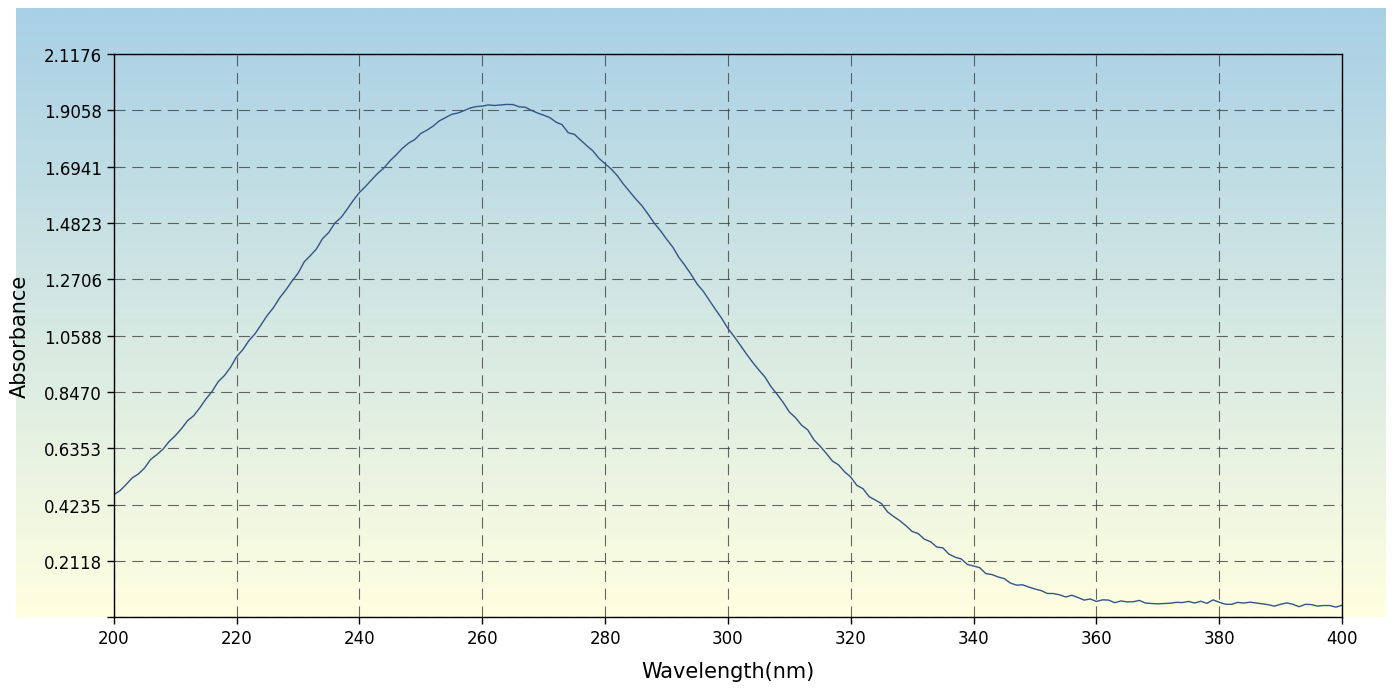


**Figure S1: Scanning Absorbance Maxima of Neratinib in Methanol (264 nm)**

**Calibration Curve Determination**

**Table 4: Calibration Curve Data of Neratinib in Methanol**

| **Sr. No.** | **Concentration (μg/mL)** | **Absorbance** |
| --- | --- | --- |
| 1 | 2 | 0.182 |
| 2 | 4 | 0.364 |
| 3 | 6 | 0.559 |
| 4 | 8 | 0.728 |
| 5 | 10 | 0.910 |
| 6 | 12 | 1.092 |
| **Slope** | | 0.091 |
| **Intercept** | | 0.0019 |
| **Correlation Coefficient (R²)** | | 0.9998 |
| **Absorption Maxima (λmax)** | | 264 nm |

**Table S1: Cumulative Percentage In Vitro Drug Release (mean ± SD, n = 3) from Neratinib–3-Hydroxybenzoic Acid Cocrystal Batches PF1–PF9 and Pure Neratinib**

| **Time (min)** | **Pure Neratinib** | **PF1** | **PF2** | **PF3** | **PF4** | **PF5** | **PF6** | **PF7** | **PF8** | **PF9** |
| --- | --- | --- | --- | --- | --- | --- | --- | --- | --- | --- |
| 0 | 0.00 ± 0.00 | 0.00 ± 0.00 | 0.00 ± 0.00 | 0.00 ± 0.00 | 0.00 ± 0.00 | 0.00 ± 0.00 | 0.00 ± 0.00 | 0.00 ± 0.00 | 0.00 ± 0.00 | 0.00 ± 0.00 |
| 5 | 3.8 ± 0.34 | 6.4 ± 0.48 | 7.9 ± 0.54 | 9.2 ± 0.61 | 10.1 ± 0.68 | 12.8 ± 0.76 | 14.6 ± 0.84 | 11.4 ± 0.72 | 15.8 ± 0.88 | 17.2 ± 0.94 |
| 10 | 6.9 ± 0.47 | 11.8 ± 0.66 | 14.2 ± 0.74 | 16.4 ± 0.82 | 17.9 ± 0.86 | 22.4 ± 1.08 | 25.6 ± 1.16 | 20.3 ± 0.98 | 27.8 ± 1.24 | 30.4 ± 1.32 |
| 15 | 9.4 ± 0.58 | 16.6 ± 0.82 | 19.8 ± 0.91 | 22.7 ± 0.98 | 25.1 ± 1.12 | 31.6 ± 1.34 | 36.2 ± 1.48 | 28.4 ± 1.22 | 39.4 ± 1.56 | 43.8 ± 1.64 |
| 20 | 11.6 ± 0.68 | 20.8 ± 0.96 | 24.9 ± 1.04 | 28.4 ± 1.12 | 31.8 ± 1.28 | 41.2 ± 1.54 | 47.1 ± 1.68 | 36.6 ± 1.38 | 51.2 ± 1.76 | 57.4 ± 1.84 |
| 30 | 14.2 ± 0.76 | 26.4 ± 1.14 | 31.6 ± 1.28 | 36.1 ± 1.36 | 40.8 ± 1.48 | 52.4 ± 1.78 | 59.6 ± 1.88 | 46.2 ± 1.62 | 63.8 ± 1.94 | 69.4 ± 2.02 |
| 45 | 16.8 ± 0.88 | 32.6 ± 1.38 | 38.4 ± 1.46 | 43.2 ± 1.58 | 48.6 ± 1.72 | 61.4 ± 1.86 | 67.8 ± 1.96 | 54.8 ± 1.84 | 72.6 ± 2.08 | 77.8 ± 2.16 |
| 60 | 18.4 ± 1.24 | 38.4 ± 1.74 | 43.6 ± 1.58 | 48.2 ± 1.86 | 54.3 ± 1.94 | 66.8 ± 2.02 | 73.4 ± 1.96 | 61.2 ± 2.08 | 78.4 ± 2.14 | 84.6 ± 1.92 |
